# Supplementary material for: Web 2.0 collaboration tool to support student research in hydrology – an opinion
Source: Copernicus journal article supplement (doi:10.5194/hess-16-2499-2012), 2012-08-06

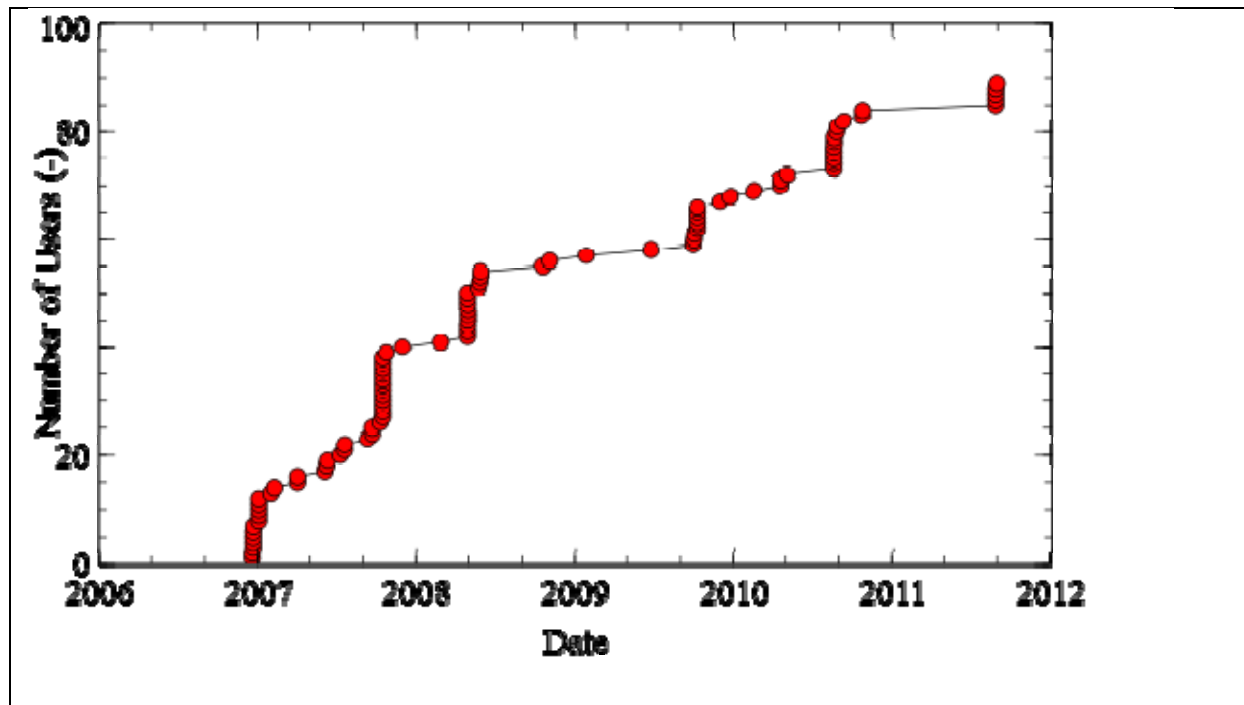

Figure S1: The number of account holders of the Wiki.

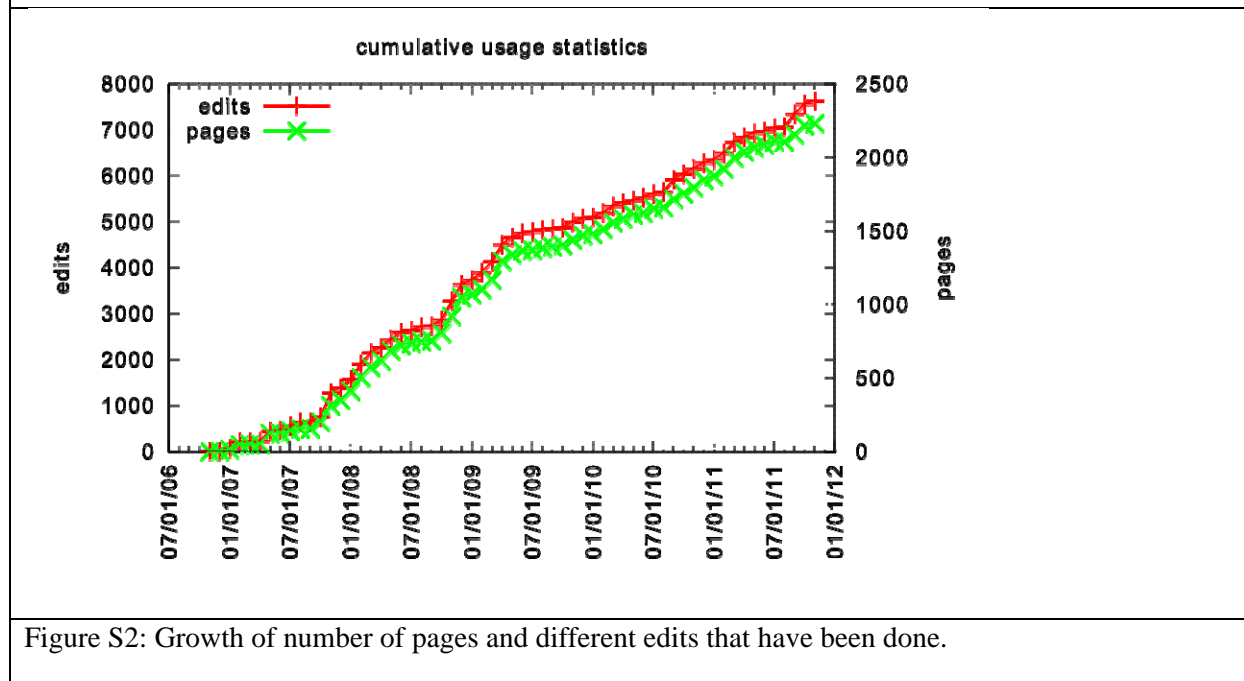

Figure S2: Growth of number of pages and different edits that have been done.

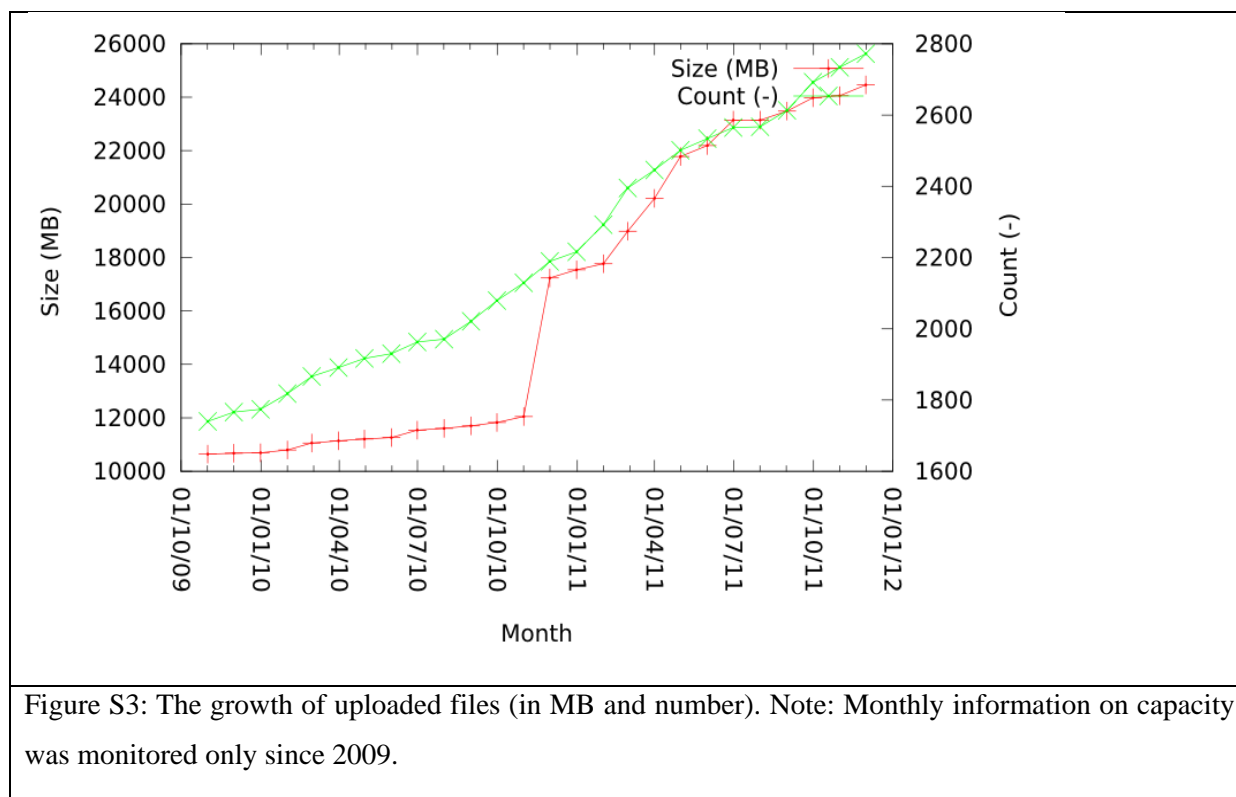

Supplement: Supplementary file 2 [file hess-16-2499-2012-supplement.zip]
